# Supplementary material
Source: MDPI journal article supplement (https://www.mdpi.com/2076-3417/11/10/4590)
Supplement: s1 [file s1]

## Supplementary Material

Table S1. The components of DNN's architecture, the output of each layer, and the parameters

| Layer (type)              | Output Shape | Param # |
|---------------------------|--------------|---------|
| =====                     | =====        | =====   |
| Hidden_Layer_1 (Dense)    | (1, 256)     | 320512  |
| Hidden_Layer_2 (Dense)    | (1, 256)     | 65792   |
| Hidden_Layer_3 (Dense)    | (1, 256)     | 65792   |
| Hidden_Layer_4 (Dense)    | (1, 256)     | 65792   |
| Hidden_Layer_5 (Dense)    | (1, 128)     | 32896   |
| Batch Normalization       | (1, 256)     | 1024    |
| Hidden_Layer_6 (Dense)    | (1, 128)     | 16512   |
| Hidden_Layer_7 (Dense)    | (1, 128)     | 16512   |
| Batch Normalization       | (1, 128)     | 512     |
| Hidden_Layer_8 (Dense)    | (1, 64)      | 8256    |
| Hidden_Layer_9 (Dense)    | (1, 64)      | 4160    |
| Hidden_Layer_10 (Dense)   | (1, 64)      | 4160    |
| Hidden_Layer_11 (Dense)   | (64)         | 4160    |
| Output Layer (Dense)      | (4)          | 260     |
| =====                     | =====        | =====   |
| Total params: 606,340     |              |         |
| Trainable params: 605,572 |              |         |
| Non-trainable params: 768 |              |         |

Table S2. The components of CNN's architecture, the output of each layer, and the parameters.

| Layer (type)              | Output Shape  | Param # |
|---------------------------|---------------|---------|
| =====                     | =====         | =====   |
| Conv_Layer_1              | (1, 1247, 50) | 300     |
| MaxPooling2D              | (1, 415, 50)  | 0       |
| Conv_Layer_2              | (1, 411, 50)  | 12550   |
| MaxPooling2               | (1, 137, 50)  | 0       |
| Conv_Layer_3              | (1, 133, 50)  | 12550   |
| MaxPooling2               | (1, 44, 50)   | 0       |
| Conv_Layer_4              | (1, 40, 50)   | 12550   |
| MaxPooling2               | (1, 13, 50)   | 0       |
| Flatten                   | (650)         | 0       |
| Hidden_Layer_1 (Dense)    | (64)          | 41664   |
| Hidden_Layer_2 (Dense)    | (64)          | 4160    |
| Batch Normalization       | (64)          | 256     |
| Hidden_Layer_3 (Dense)    | (32)          | 2080    |
| Hidden_Layer_4 (Dense)    | (32)          | 1056    |
| Output Layer (Dense)      | (4)           | 132     |
| =====                     | =====         | =====   |
| Total params: 87,298      |               |         |
| Trainable params: 87,170  |               |         |
| Non-trainable params: 128 |               |         |

Table S3. The components of RNN’s architecture, the output of each layer, and the parameters.

| Layer (type)              | Output Shape   | Param # |
|---------------------------|----------------|---------|
| =====                     |                |         |
| LSTM_1                    | (None, 1, 128) | 706560  |
| LSTM_2                    | (None, 128)    | 131584  |
| Hidden_Layer_1 (Dense)    | (128)          | 16512   |
| Hidden_Layer_2 (Dense)    | (128)          | 16512   |
| Output Layer (Dense)      | (4)            | 516     |
| =====                     |                |         |
| Total params: 871,684     |                |         |
| Trainable params: 871,684 |                |         |
| Non-trainable params: 0   |                |         |
| =====                     |                |         |

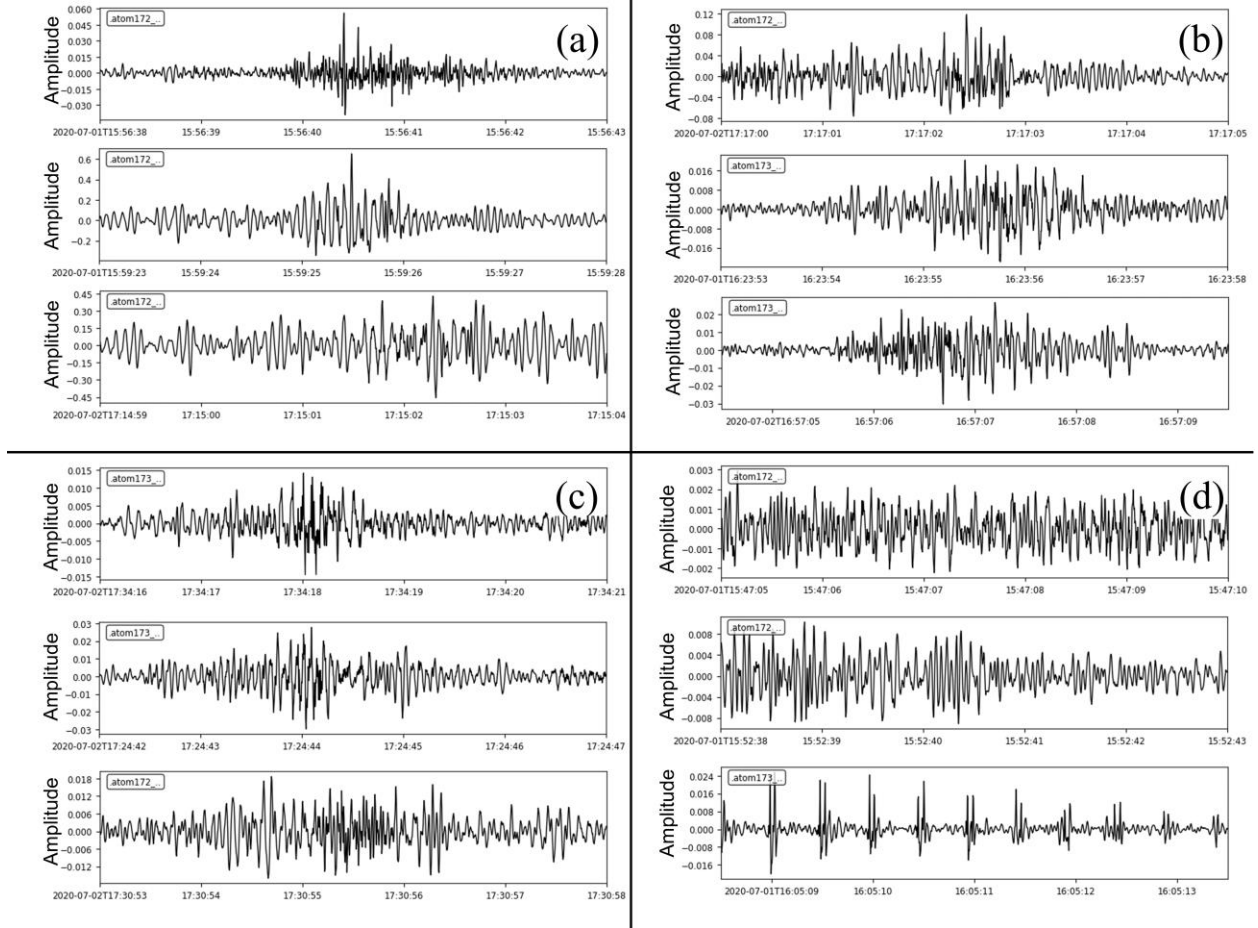

Figure S1. Examples of the waveforms used in the training process. (a) Examples for large vehicles like buses and trucks, (b) examples for medium vehicles like cars, (c) examples for small vehicles like motorcycles, (d) examples for noise like people walking, winds, and side street maintenance.

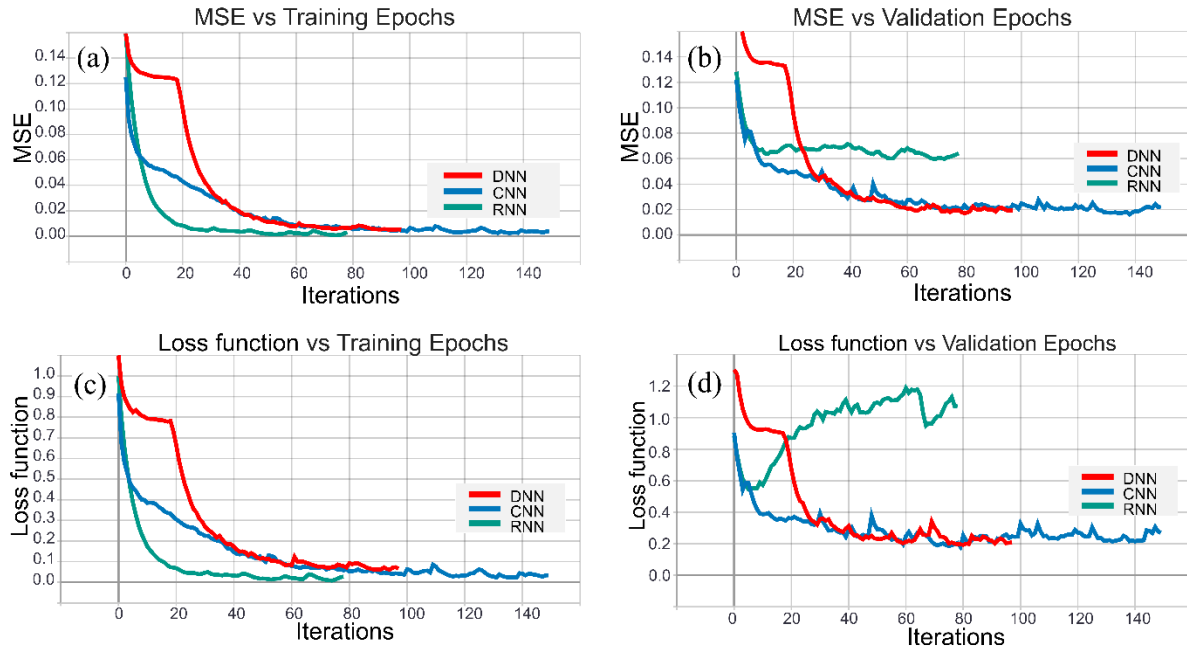

Figure S2. Other factors were monitored while the training and validation process for DNN(red), CNN(blue), and RNN (green). (a) The curve of Mean Square Error (MSE) improving while training, (b) MSE curve while validating the methods, (c) the decreasing of the loss function while training, (d) loss function curve while validating the methods.
